# Supplementary material
Source: PubMed Central journal article supplement (PMC6682093)
Supplement: ao9b01235_si_004.pdf [file ao9b01235_si_004.pdf]

## **Supporting Information**

### **On-demand Oil-Water Separation by Environmentally-responsive Cotton Fabrics**

**Meina Xiao, Yinghui Huang, Anli Xu, Tongtong Zhang, Chengdong Zhan and Liangzhi Hong\***

Department of Polymer Materials Science and Engineering, South China University of Technology, Guangzhou 510641, China.

To whom correspondence should be addressed.

\*E-mail: [msslzhong@scut.edu.cn](mailto:msslzhong@scut.edu.cn)

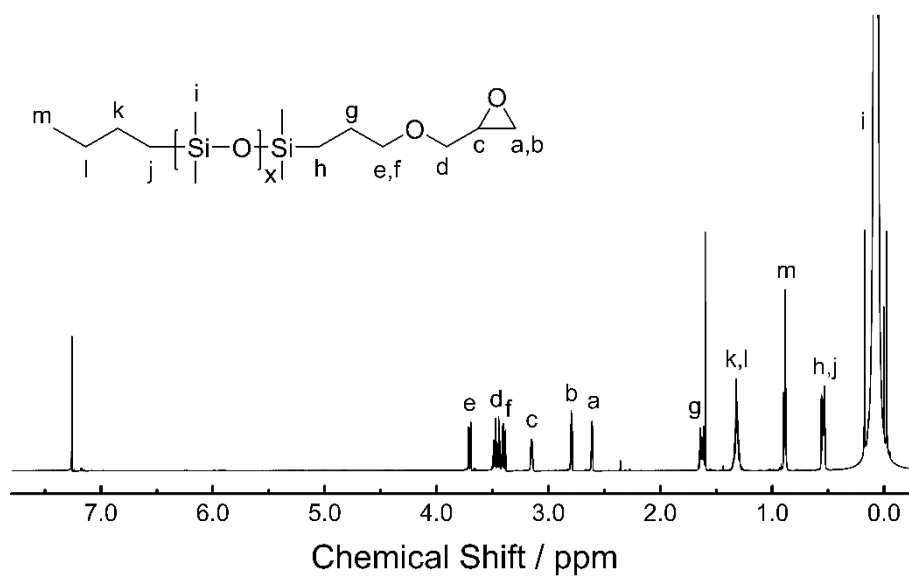

**Figure S1.**  $^1\text{H}$  NMR spectra of epoxide-terminated PDMS in  $\text{CDCl}_3$ .

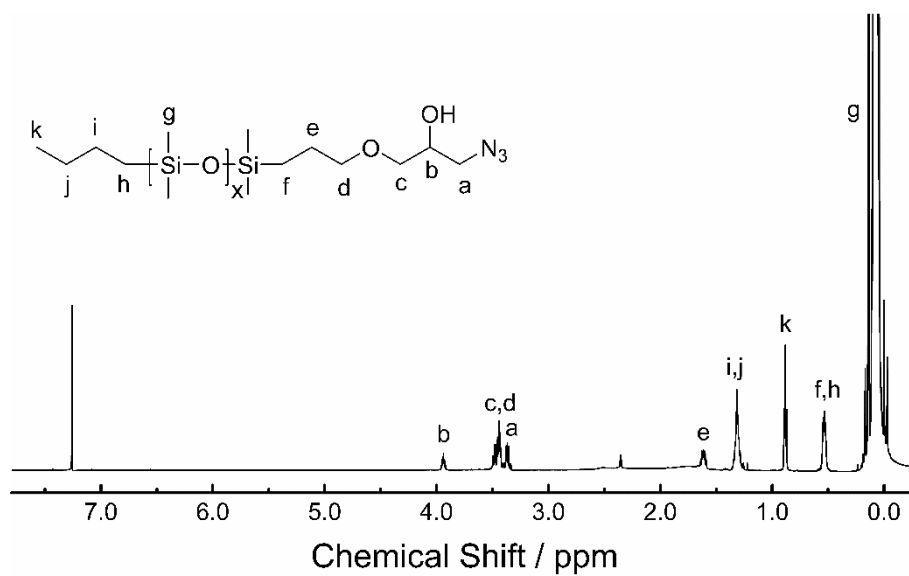

**Figure S2.**  $^1\text{H}$  NMR spectra of azide-functionalized PDMS [PDMS-(OH,  $\text{N}_3$ )] (**1**) in  $\text{CDCl}_3$ .

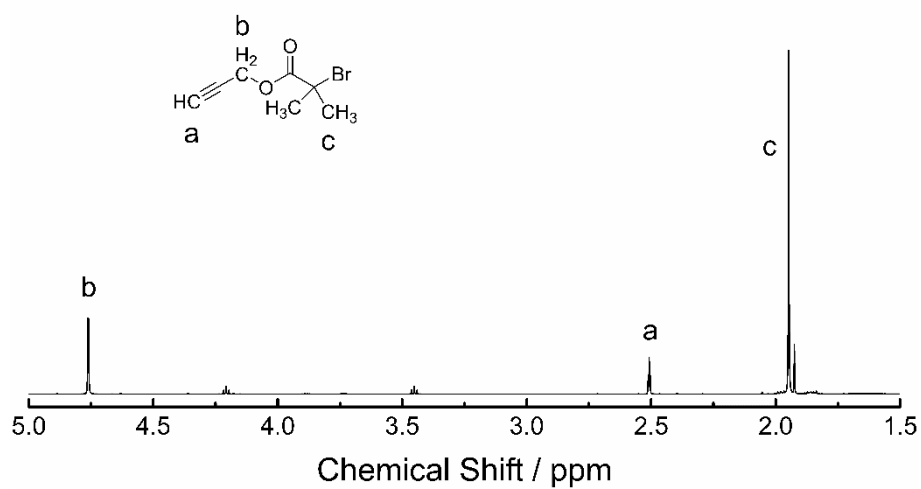

**Figure S3.**  $^1\text{H}$  NMR spectra of propargyl 2-bromoisobutyrate (PBiB) in  $\text{CDCl}_3$ .

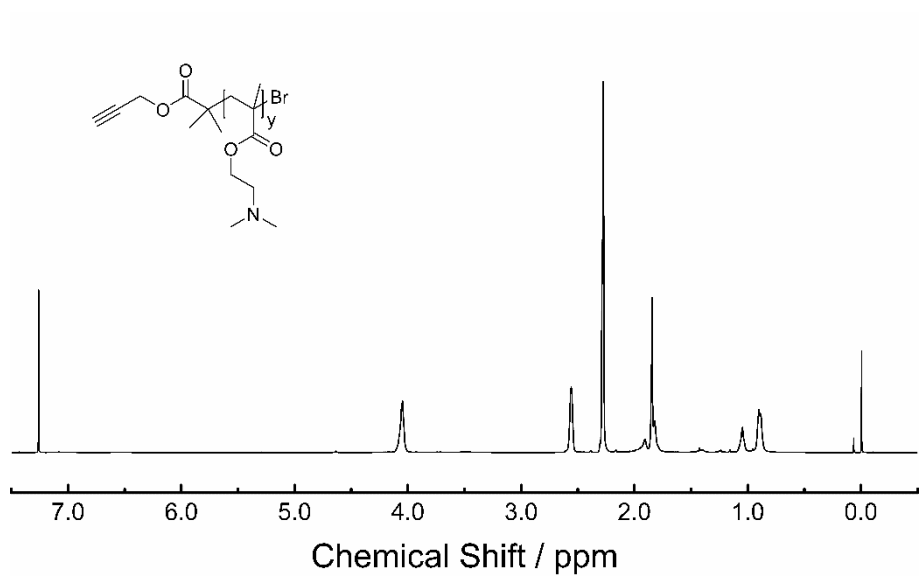

**Figure S4.**  $^1\text{H}$  NMR spectra of  $\alpha$ -alkynyl- $\omega$ -bromo-poly(*N,N*-dimethylaminoethyl methacrylate) (alkynyl-PDMAEMA<sub>42</sub>-Br) in  $\text{CDCl}_3$ .

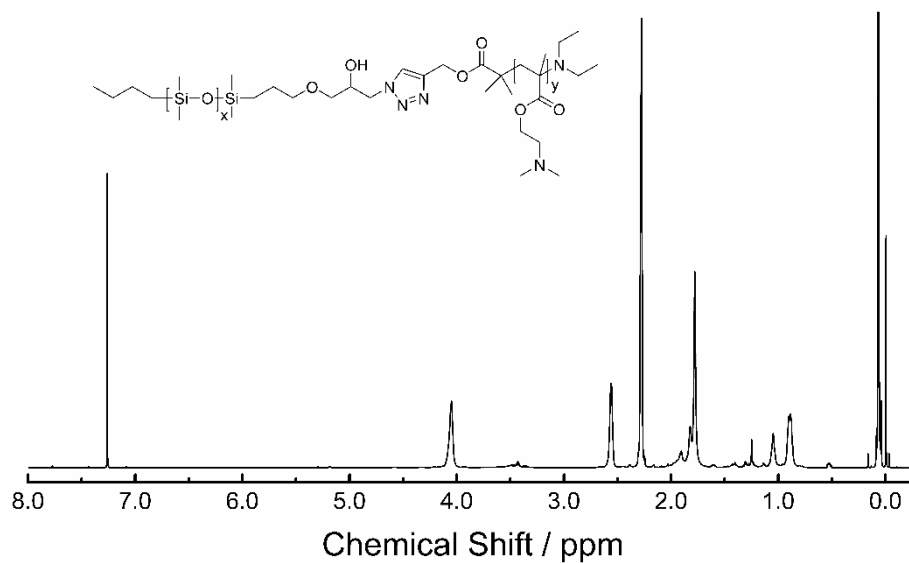

**Figure S5.**  $^1\text{H}$  NMR spectra of poly(dimethylsiloxane)-(OH)-*b*-poly(*N,N*-dimethylaminoethyl methacrylate) (PDMS<sub>64</sub>-(OH)-*b*-PDMAMEA<sub>42</sub>) in CDCl<sub>3</sub>.

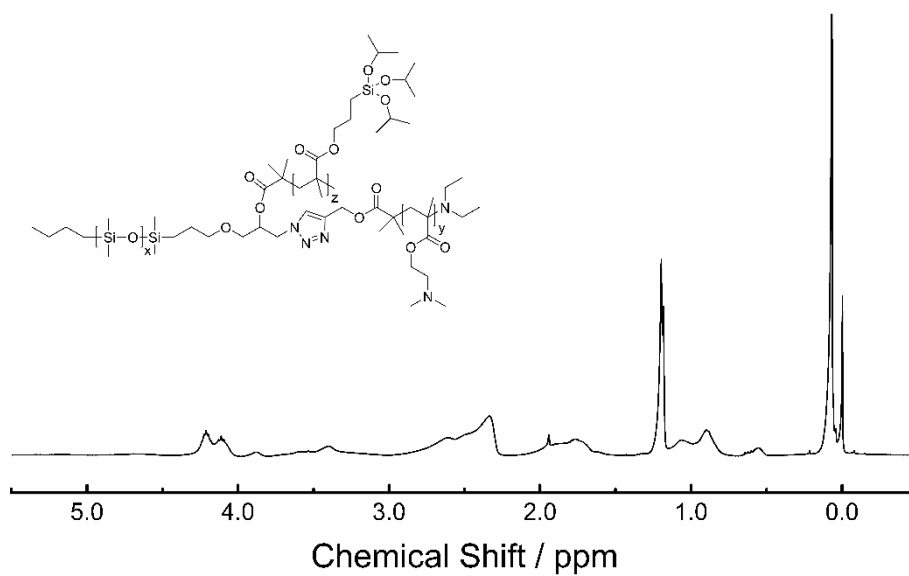

**Figure S6.**  $^1\text{H}$  NMR spectra of  $\mu$ -PDMS<sub>64</sub>-*b*-PDMAEMA<sub>42</sub>-*b*-PIPSMA<sub>22</sub> (P1) in CDCl<sub>3</sub>.

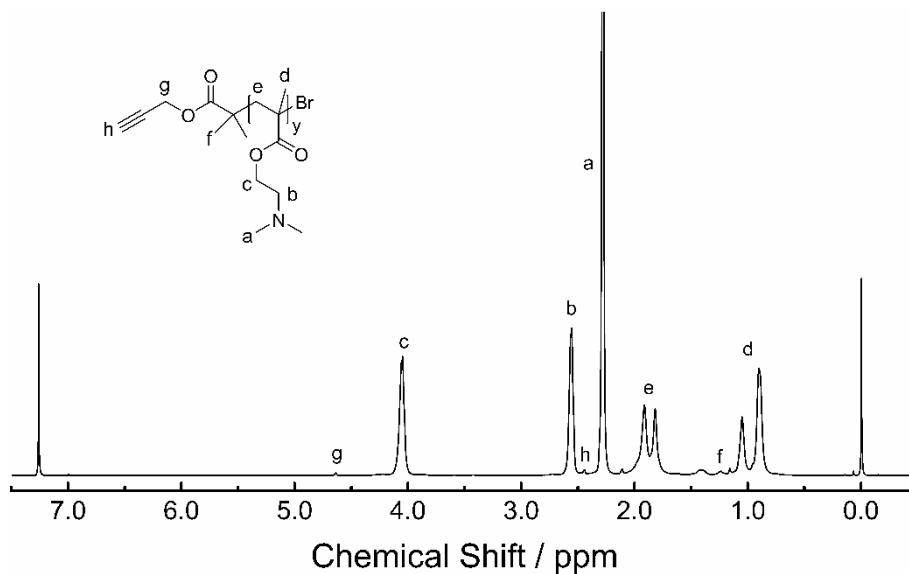

**Figure S7.** <sup>1</sup>H NMR spectra of α-alkynyl-ω-bromo-poly(*N,N*-dimethylaminoethyl methacrylate) (alkynyl-PDMAEMA<sub>121</sub>-Br) in CDCl<sub>3</sub>.

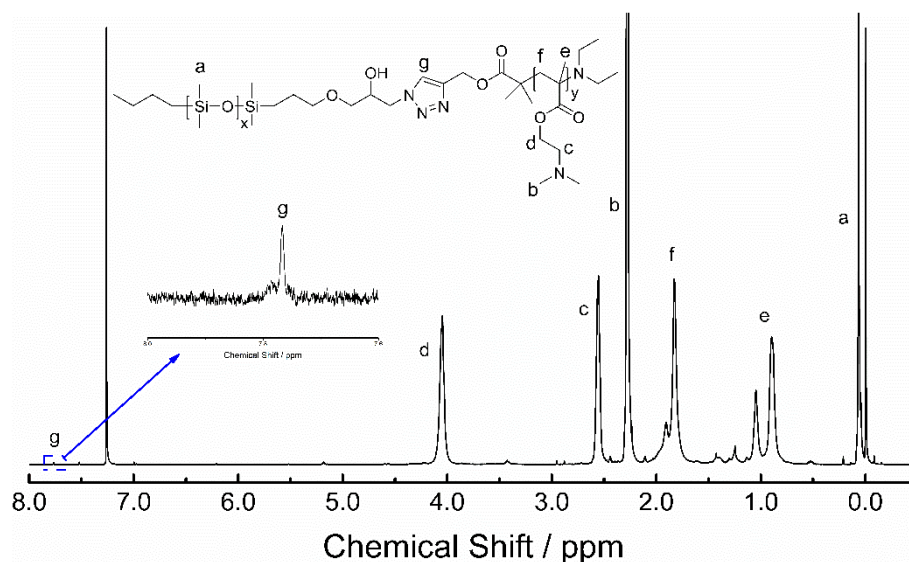

**Figure S8.** <sup>1</sup>H NMR spectra of poly(dimethylsiloxane)-(OH)-*b*-poly(*N,N*-dimethylaminoethyl methacrylate) (PDMS<sub>64</sub>-(OH)-*b*-PDMAMEA<sub>121</sub>) (**3**) in CDCl<sub>3</sub>.

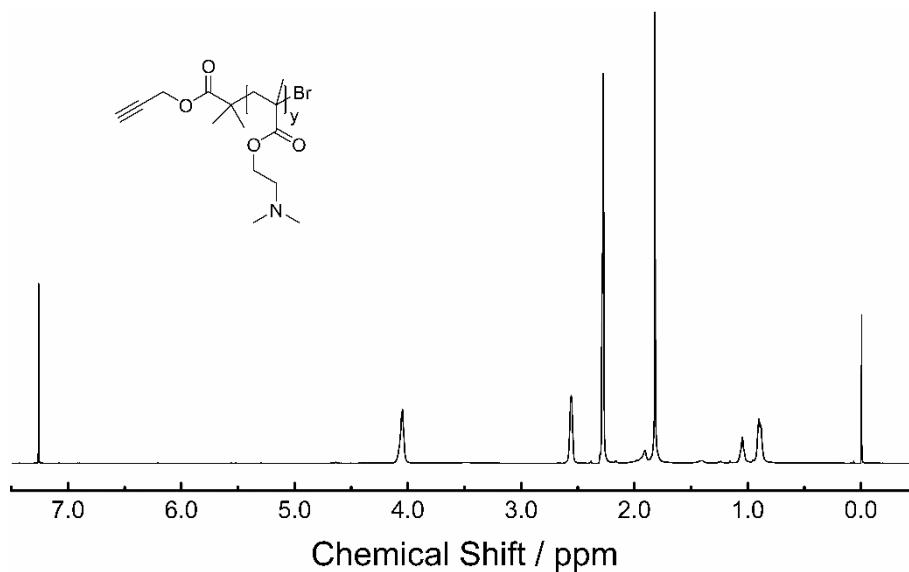

**Figure S9.** <sup>1</sup>H NMR spectra of α-alkynyl-ω-bromo-poly(*N,N*-dimethylaminoethyl methacrylate) (alkynyl-PDMAEMA<sub>148</sub>-Br) in CDCl<sub>3</sub>.

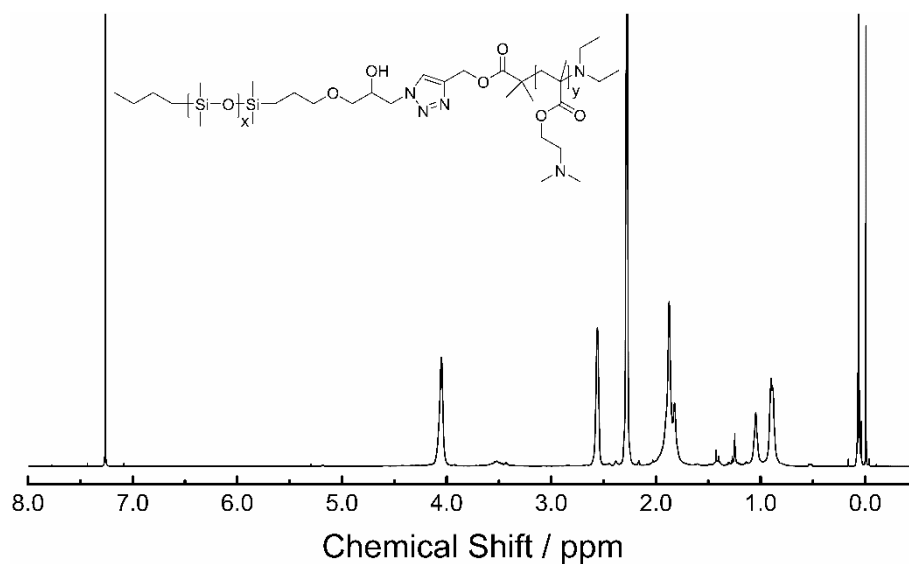

**Figure S10.** <sup>1</sup>H NMR spectra of poly(dimethylsiloxane)-(OH)-*b*-poly(*N,N*-dimethylaminoethyl methacrylate) (PDMS<sub>64</sub>-(OH)-*b*-PDMAMEA<sub>148</sub>) in CDCl<sub>3</sub>.

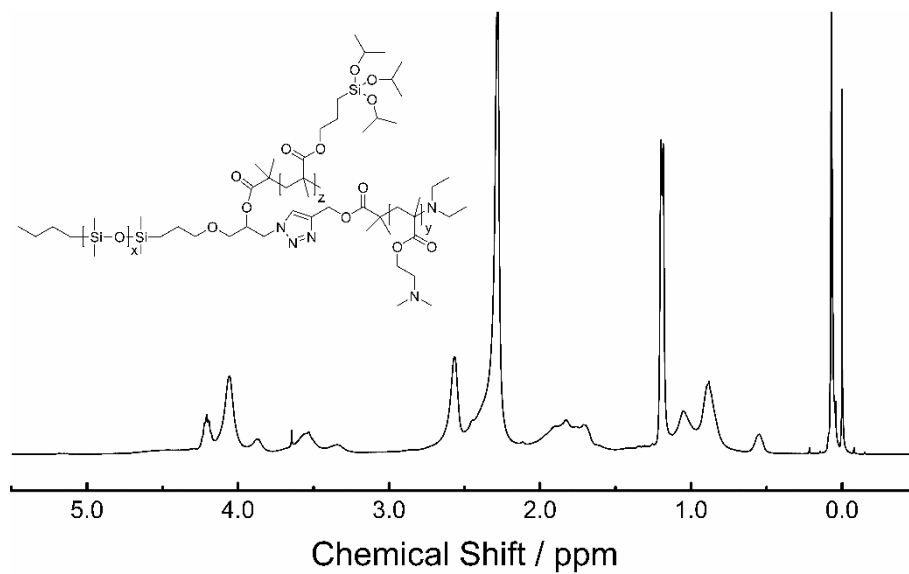

**Figure S11.**  $^1\text{H}$  NMR spectra of  $\mu\text{-PDMS}_{64}\text{-}b\text{-PDMAEMA}_{148}\text{-}b\text{-PIPSMA}_{25}$  (P3) in  $\text{CDCl}_3$ .

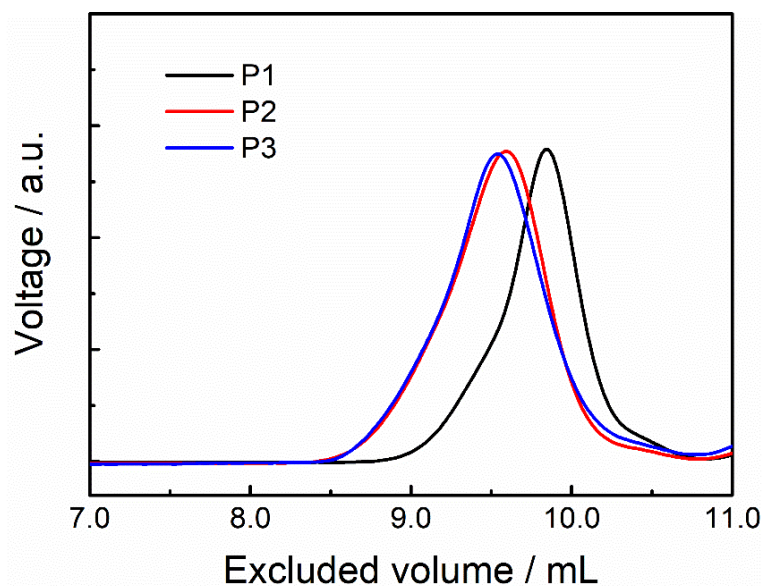

**Figure S12.** GPC curves of  $\mu\text{-PDMS-}b\text{-PDMAEMA-}b\text{-PIPSMA}$  ABC miktoarm star terpolymers.

**Table S1.** Characteristics of synthesized polymers.

| Sample                                                                                             | $M_n^a$<br>(Kg mol <sup>-1</sup> ) | $(M_w/M_n)^b$ | $f_{\text{PDMS}}^c$ | $f_{\text{PDMAEMA}}^c$ | $f_{\text{PIPSMA}}^c$ |
|----------------------------------------------------------------------------------------------------|------------------------------------|---------------|---------------------|------------------------|-----------------------|
| PDMS <sub>64</sub> -OH                                                                             | 5.0                                | 1.13          | -                   | --                     | --                    |
| $\alpha$ -alkynyl-PDMAEMA <sub>42</sub> -N(Et) <sub>2</sub>                                        | 6.8                                | 1.14          | -                   | --                     | --                    |
| $\mu$ -PDMS <sub>64</sub> - <i>b</i> -PDMAEMA <sub>42</sub> - <i>b</i> -PIPSMA <sub>22</sub> (P1)  | 19.2                               | 1.30          | 26.4                | 34.9                   | 38.7                  |
| $\alpha$ -alkynyl-PDMAEMA <sub>121</sub> -N(Et) <sub>2</sub>                                       | 19.2                               | 1.13          | -                   | --                     | --                    |
| $\mu$ -PDMS <sub>64</sub> - <i>b</i> -PDMAEMA <sub>121</sub> - <i>b</i> -PIPSMA <sub>24</sub> (P2) | 32.3                               | 1.29          | 15.6                | 59.5                   | 24.9                  |
| $\alpha$ -alkynyl-PDMAEMA <sub>148</sub> -N(Et) <sub>2</sub>                                       | 23.4                               | 1.14          | -                   | --                     | --                    |
| $\mu$ -PDMS <sub>64</sub> - <i>b</i> -PDMAEMA <sub>148</sub> - <i>b</i> -PIPSMA <sub>25</sub> (P3) | 36.8                               | 1.26          | 13.7                | 63.6                   | 22.7                  |

<sup>a</sup> Determined by <sup>1</sup>H NMR in CDCl<sub>3</sub>. <sup>b</sup> Determined by GPC with calibrated PS standards at 35 °C. <sup>c</sup> The weight fractions (wt%) were determined by <sup>1</sup>H NMR.



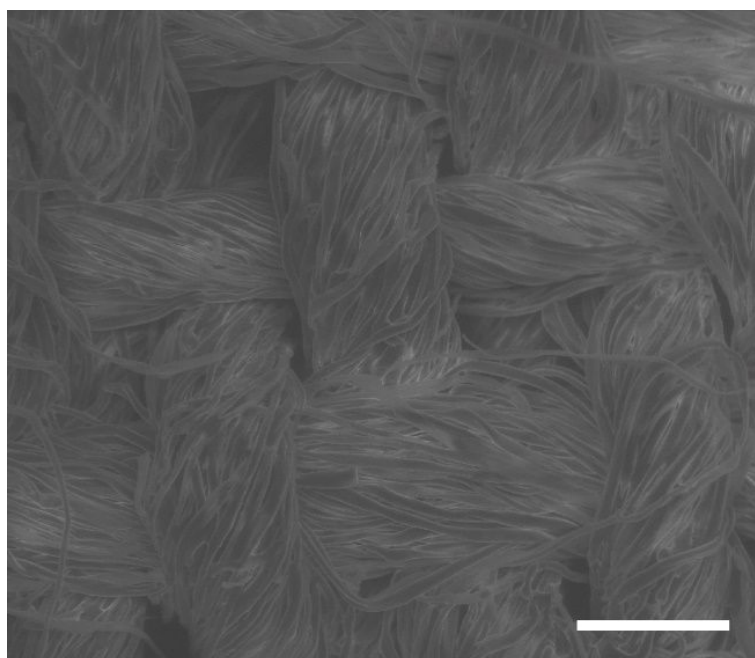

**Figure S13.** SEM image of the fabric used. The scale bar is 200  $\mu\text{m}$ .

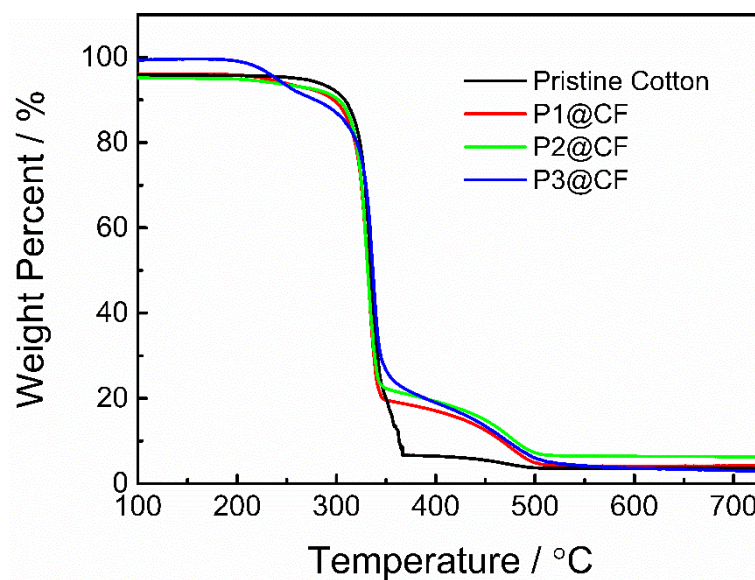

**Figure S14.** TGA traces of pristine cotton fabrics and functionalized cotton fabrics with P1, P2 and P3.

**Table S2.** Mass fraction of grafted block copolymer in the functionalized cotton fabrics.

|       | $w_0 / \text{g}$ | $w_1 / \text{g}$ | $x / \%$ |
|-------|------------------|------------------|----------|
| P1@CF | 0.1908           | 0.2124           | 11.3     |
| P2@CF | 0.1855           | 0.2035           | 9.7      |
| P3@CF | 0.1864           | 0.1994           | 7.0      |

$w_0$ : weights of the pristine cotton fabrics before dip-coating;  $w_1$ : weights of the functionalized cotton fabrics. Mass fraction of grafted block copolymer  $x$  is determined by the following equation:  $x = (w_1 - w_0) / w_0 \times 100\%$

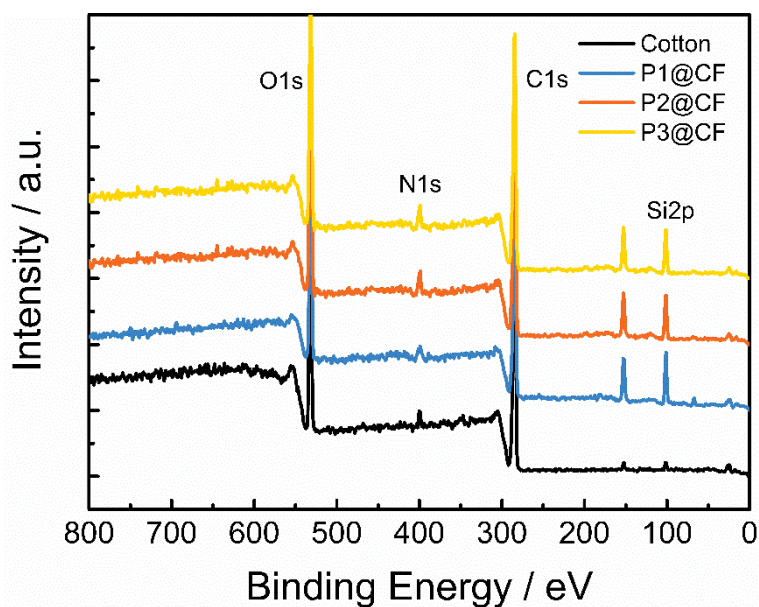

**Figure S15.** XPS spectra of pristine cotton fabrics and functionalized cotton fabrics with P1, P2, and P3.

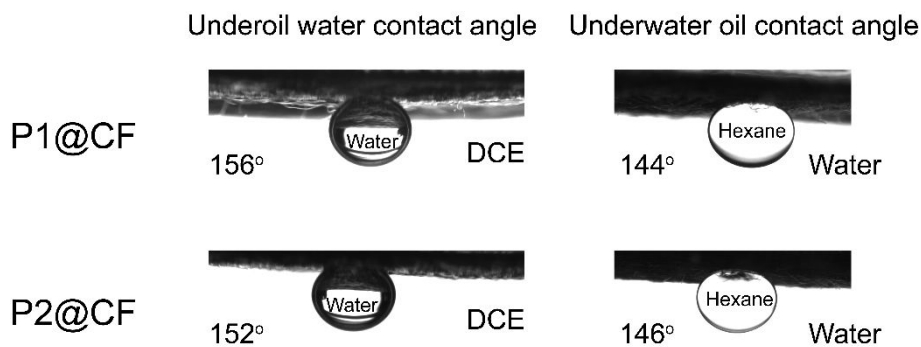

**Figure S16.** Underoil water contact angle of P1@CF and P2@CF, the oil is dichloroethane (DCE). And underwater oil contact angle of P1@CF and P2@CF. The oil is hexane.

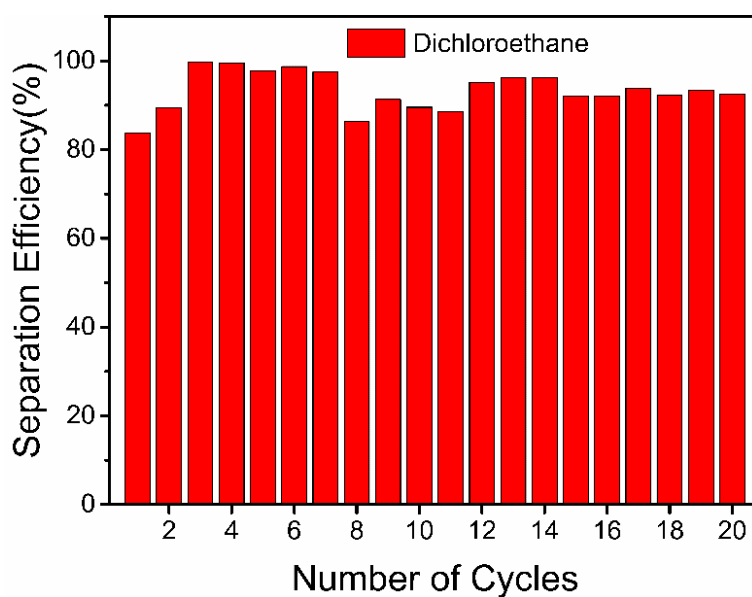

**Figure S17.** Oil/water separation efficiency versus recycle numbers. The oil is dichloroethane and the membrane used is P1@CF. The separation efficiency was determined by comparing the weight of dichloroethane before and after separation.

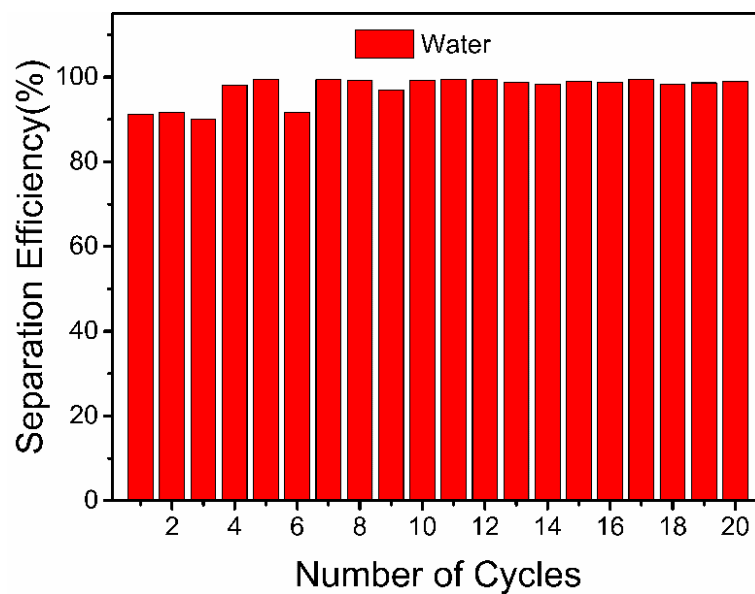

**Figure S18.** Oil/water separation efficiency versus recycle numbers. The oil is hexane and the membrane used is P1@CF. The separation efficiency was determined by comparing the weight of water before and after separation.

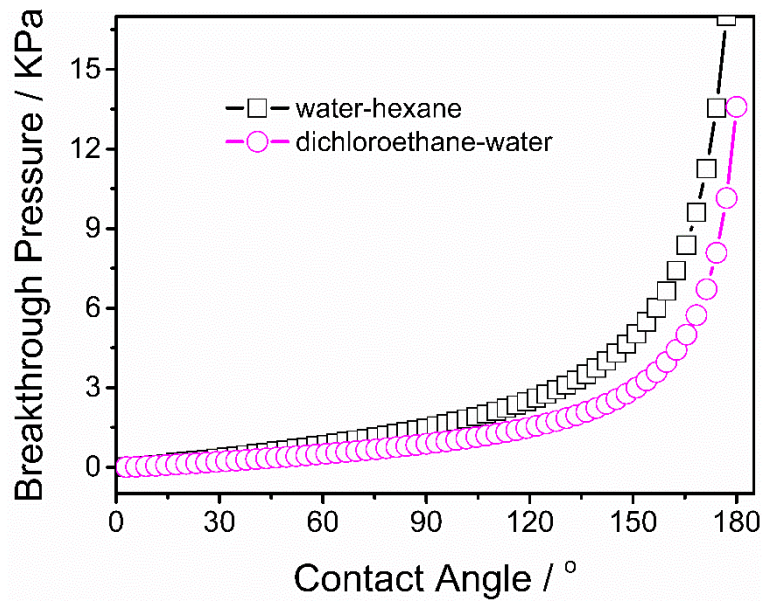

**Figure S19.** Relationship between breakthrough pressure ( $P_{bt}$ ) and contact angle  $\theta'$  given by

the equation:  $P_{bt} = \frac{2R\gamma_{12}}{D^2} \frac{1 - \cos(\theta')}{1 + 2(R/D)\sin(\theta')}$ , here R is the cylinder radius, D is the half of the

inter-cylinder spacing,  $\gamma_{12}$  is the interfacial tension between the wetting phase and non-wetting phase, and

$\theta'$  is the contact angle of the non-wetting liquid droplet on the fabric surface in the wetting phase. For the

fabrics used, R and D are 100 and 30 microns, respectively.  $\gamma_{\text{water-hexane}}$  is 51.1 mN/m,  $\gamma_{\text{dichloroethane-water}} =$

30.5 mN/m.
